# Supplementary material for: Heat shock drives genomic instability and phenotypic variations in yeast
Source: PubMed Central journal article supplement (PMC7431486; doi:10.1186/s13568-020-01091-7), 2020-08-17
Supplement: 13568_2020_1091_MOESM1_ESM.pdf [file 13568_2020_1091_MOESM1_ESM.pdf]

**AMB Express**

**Heat shock drives genomic instability and phenotypic variations in yeast**

Li Shen, Yu-Ting Wang, Xing-Xing Tang, Ke Zhang, Pin-Mei Wang, Yang Sui\*,

Dao-Qiong Zheng\*

Ocean College, Zhejiang University, Zhoushan, Zhejiang Province, 316021, China

\*Corresponding author. Tel: +86 571 88206636; Fax: +86 571 88206627; E-mail

address: [suiyang@zju.edu.cn](mailto:suiyang@zju.edu.cn) (Y.S) or [zhengdaoqiong@zju.edu.cn](mailto:zhengdaoqiong@zju.edu.cn) (D-Q.Z)

**Table S1** Aneuploidy events in the 15 sectored colonies (S1-S15).

---

| <b>Sectored colonies</b> | <b>Aneuploidy events</b>                                                                                                     |
|--------------------------|------------------------------------------------------------------------------------------------------------------------------|
| S4                       | Monosomy of YJM789-derived chromosome III in the red sector and trisomy of YJM789-derived chromosome III in the white sector |
| S7                       | Monosomy of YJM789-derived chromosome IX in the red sector and trisomy of YJM789-derived chromosome IX in the white sector   |
| S11                      | Trisomy of W303-1A derived chromosome VIII and XVI in the red sector                                                         |
| S15                      | Trisomy of W303-1A derived chromosome VI in the red sector and monosomy of W303-1A derived chromosome VI in the white sector |

---

**Table S2.** Genomic alterations detected by whole-genome SNP microarray in 21 JSC25-derived isolates (JP1-JP21).

| Isolate | Chr  | Event <sup>a</sup> | Class  | Markers flanking transitions |         | Coordinates of LOH event |         |
|---------|------|--------------------|--------|------------------------------|---------|--------------------------|---------|
|         |      |                    |        | Left                         | Right   | Left                     | Right   |
| JP1     | V    | CON                | b1     | 30652                        | 31251   | 30652                    | 32231   |
|         |      |                    |        | 31251                        | 32231   |                          |         |
| JP4     | IV   | CON                | b1     | 967022                       | 967772  | 967022                   | 969944  |
|         |      |                    |        | 969369                       | 969944  |                          |         |
|         | XII  | Ter                | a4     | 447537                       | 490725  | 447537                   | 490725  |
| JP6     | V    | Del                | d1     | 32231                        | 32429   | 32231                    | 34235   |
|         |      |                    |        | 33770                        | 34235   |                          |         |
|         | VII  | CON                | b2     | 647381                       | 653149  | 647381                   | 657746  |
|         |      |                    |        | 655388                       | 657746  |                          |         |
|         | XVI  | CON                | b2     | 816528                       | 824722  | 816528                   | 832669  |
|         |      |                    |        | 831138                       | 832669  |                          |         |
| JP8     | IV   | CON                | b1     | 1289953                      | 1292325 | 1289953                  | 1293979 |
|         |      |                    |        | 1292496                      | 1293979 |                          |         |
|         | VII  | CON                | b1     | 29386                        | 32836   | 29386                    | 43381   |
|         |      |                    |        | 33882                        | 43381   |                          |         |
| JP9     | VII  | Ter                | a2     | 33882                        | 43381   | 33882                    | 43381   |
| JP11    | VIII | CON                | b1     | 474198                       | 482764  | 474198                   | 492456  |
|         |      |                    |        | 487802                       | 492456  |                          |         |
| JP13    | IV   | Ter                | a1     | 132549                       | 136505  | 132549                   | 136505  |
|         | IV   | Ter                | a3     | 909432                       | 910662  | 909432                   | 910662  |
|         | X    | CON                | b1     | 144943                       | 146303  | 144943                   | 153061  |
|         |      |                    |        | 149069                       | 153061  |                          |         |
|         | XIV  | CON                | b2     | 234905                       | 247556  | 234905                   | 294378  |
|         |      |                    |        | 268741                       | 294378  |                          |         |
|         | XV   | CON                | c1     | 930009                       | 931533  | 930009                   | 966210  |
|         |      |                    |        | 935109                       | 942300  |                          |         |
|         |      |                    |        | 949471                       | 958063  |                          |         |
|         |      |                    | 958063 | 966210                       |         |                          |         |
| JP14    | XII  | CON                | b1     | 228409                       | 234166  | 228409                   | 253263  |
|         |      |                    |        | 250968                       | 253263  |                          |         |
|         | XII  | Ter                | a3     | 623970                       | 631728  | 623970                   | 631728  |

<sup>a</sup> CON, Ter, and Tel indicates gene conversion, terminal LOH, and deletion event, respectively.

**Table S3.** Genomic alterations detected by whole-genome SNP microarray in ethanol

tolerant mutants E1-E5.

| Isolate | Chr | Event <sup>a</sup> | Class | Markers flanking transitions |         | Coordinates of LOH event |         |
|---------|-----|--------------------|-------|------------------------------|---------|--------------------------|---------|
|         |     |                    |       | Left                         | Right   | Left                     | Right   |
| E1      | IV  | Ter                | a4    | 793712                       | 793805  | 793712                   | 793805  |
|         |     |                    |       |                              |         |                          |         |
| E2      | IV  | Ter                | a4    | 1111969                      | 1142607 | 1111969                  | 1142607 |
|         |     |                    |       |                              |         |                          |         |
|         | XII | UPD                |       |                              |         |                          |         |
| E3      | IV  | Ter                | a4    | 749244                       | 750033  | 749244                   | 750033  |
|         |     |                    |       |                              |         |                          |         |
| E4      | IV  | Ter                | a4    | 471247                       | 476888  | 471247                   | 476888  |
|         |     |                    |       |                              |         |                          |         |
|         | XVI | CON                | b1    |                              |         |                          |         |
|         |     |                    |       |                              |         |                          |         |
| E5      | IV  | UPD                |       |                              |         |                          |         |

<sup>a</sup> CON, Ter, and UPD indicates gene conversion, terminal LOH, and uniparental disomy, respectively.

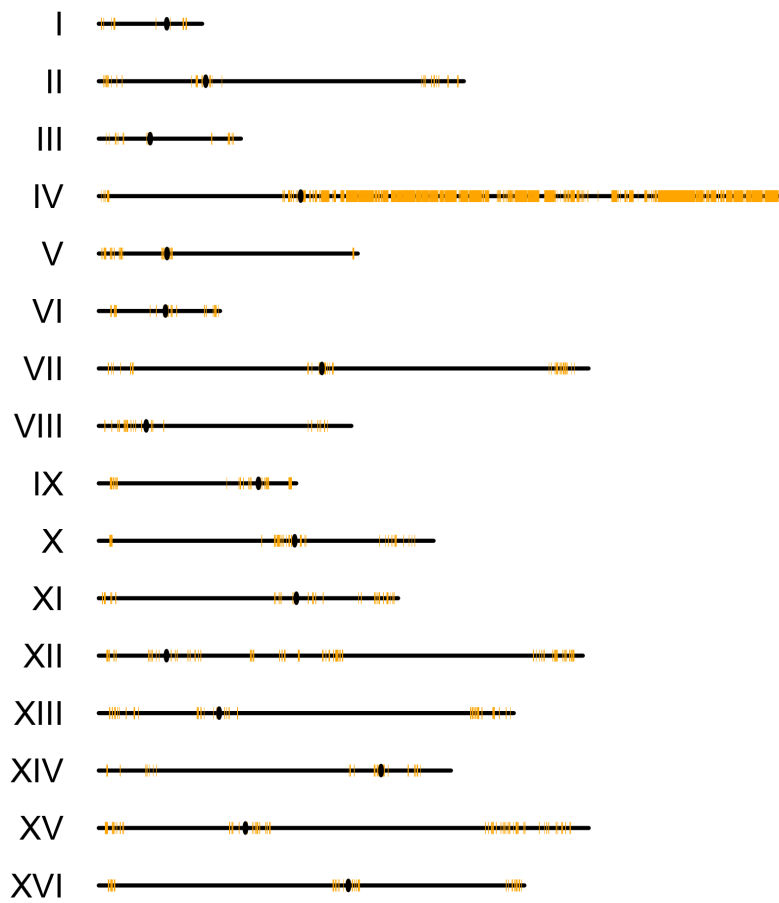

**Fig. S1.** The distribution of SNP markers across 16 chromosomes (I-XVI) of yeast genome of the custom SNP microarray. Centromeres are shown as black ovals and SNPs as short yellow vertical lines.

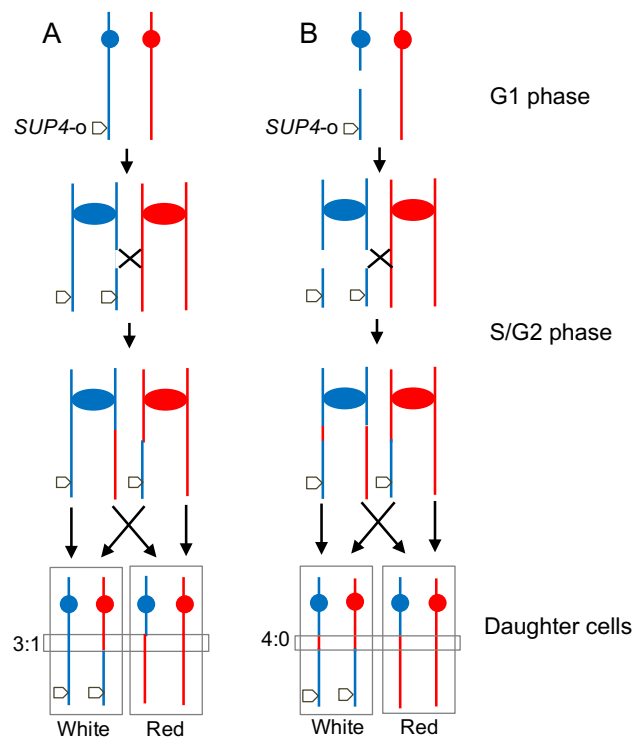

**Fig. S2.** Different patterns of gene conversion tracts generated by crossover events

initiated by the double strand breaks occurred on (A) S/G2 phase and (B) G1 phase.

The blue and red lines represent YJM789- and W303-1A-derived homologs in the diploid strain JSC25-1.
